# Supplementary material
Source: Research Square preprint supplement (doi:10.21203/rs.3.rs-10146877/v1)
Supplement: Supplementary file 1 [file 426aca8a9f648350444ece60.docx]

**SUPPLEMENTARY MATERIALS**

**MAOM stoichiometry and Fe-P coupling reveal soil-mediated pathways linking climate to grassland vegetation on the Mongolian Plateau**

**Zhihao Wang1, Yu Zheng2, Ying Sun2, Liang Li2, Rong Wei1, Changwei Lü1,** [[1]](#footnote-1)*

1. Inner Mongolia Key Laboratory of River and Lake Ecology, School of Ecology and Environment, Inner Mongolia University, Hohhot 010021, China
2. Inner Mongolia Environmental Monitoring Center, Hohhot, 010011, China


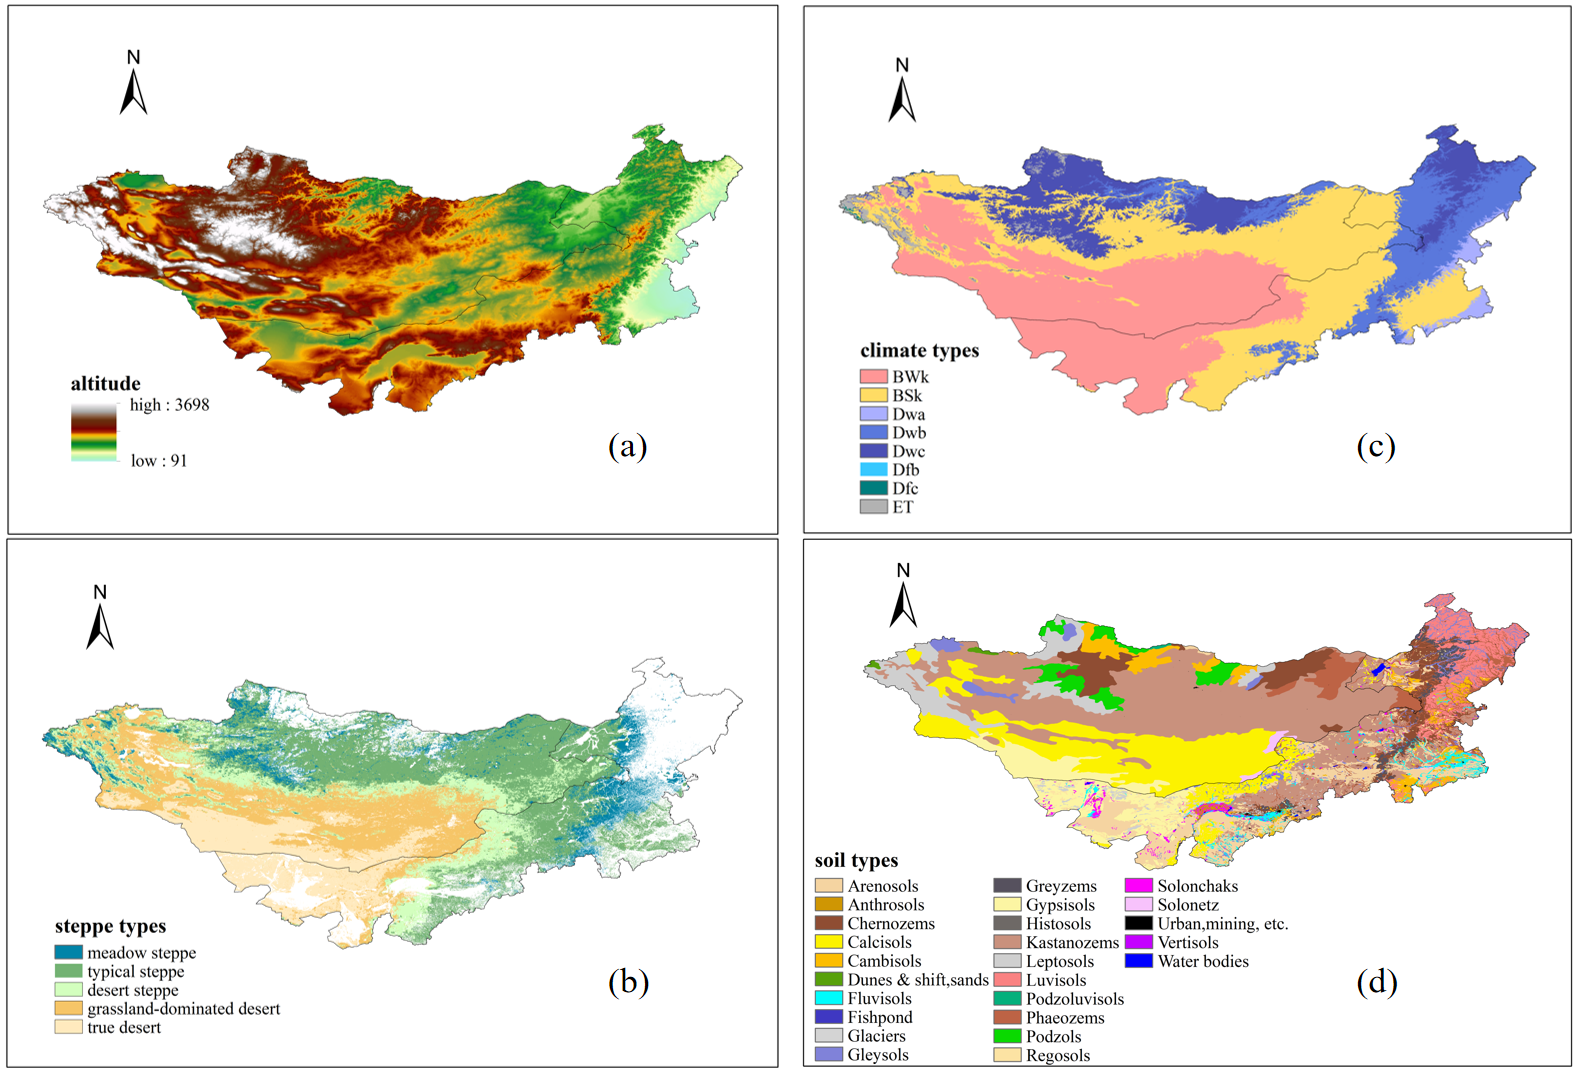


**Fig. S1** The general situation of the attitude (a), climate types (b), grassland types (c) and soil types (d) in the Mongolian Plateau


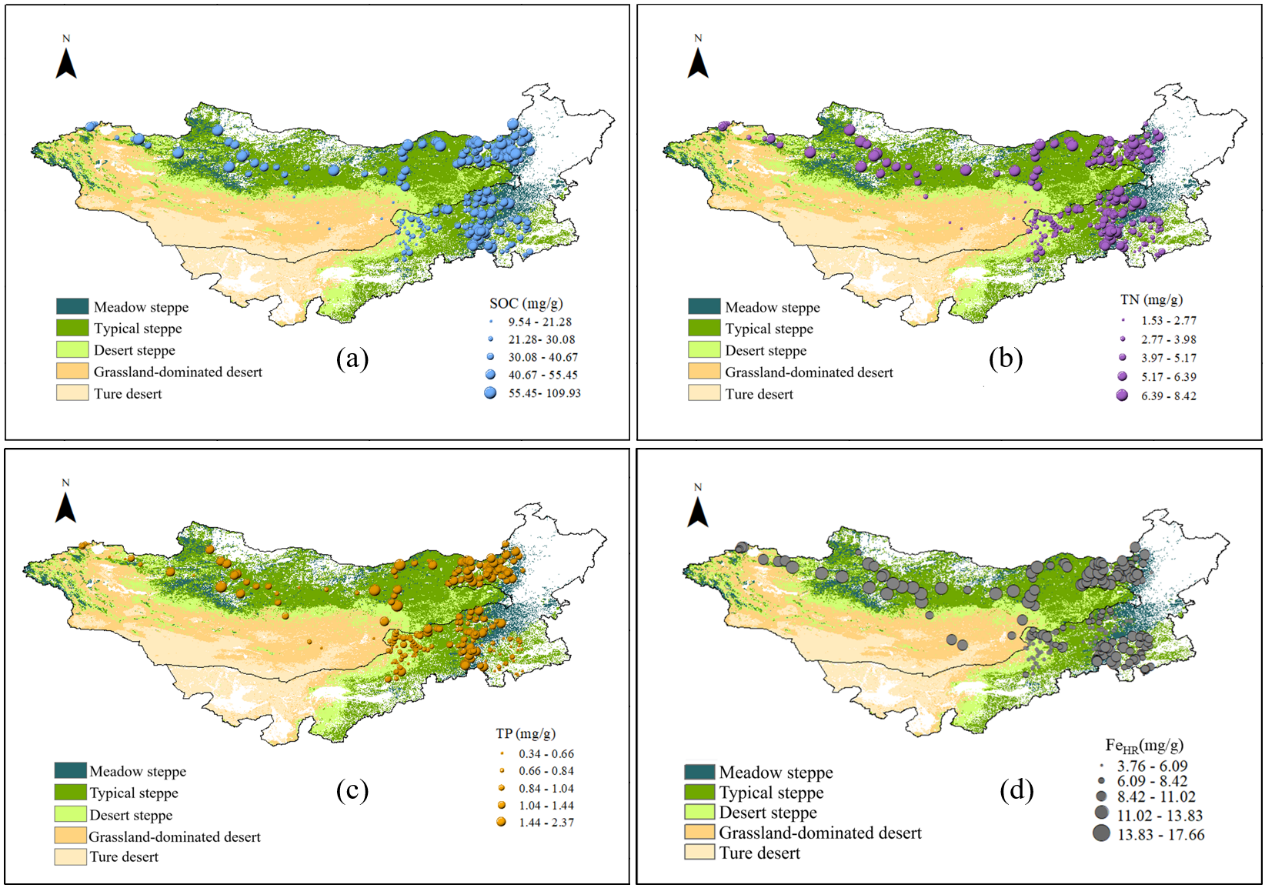


**Fig. S2** The spatial distribution of soil organic carbon(a), total nitrogen(b), total phosphorus(c), and effective iron(d)


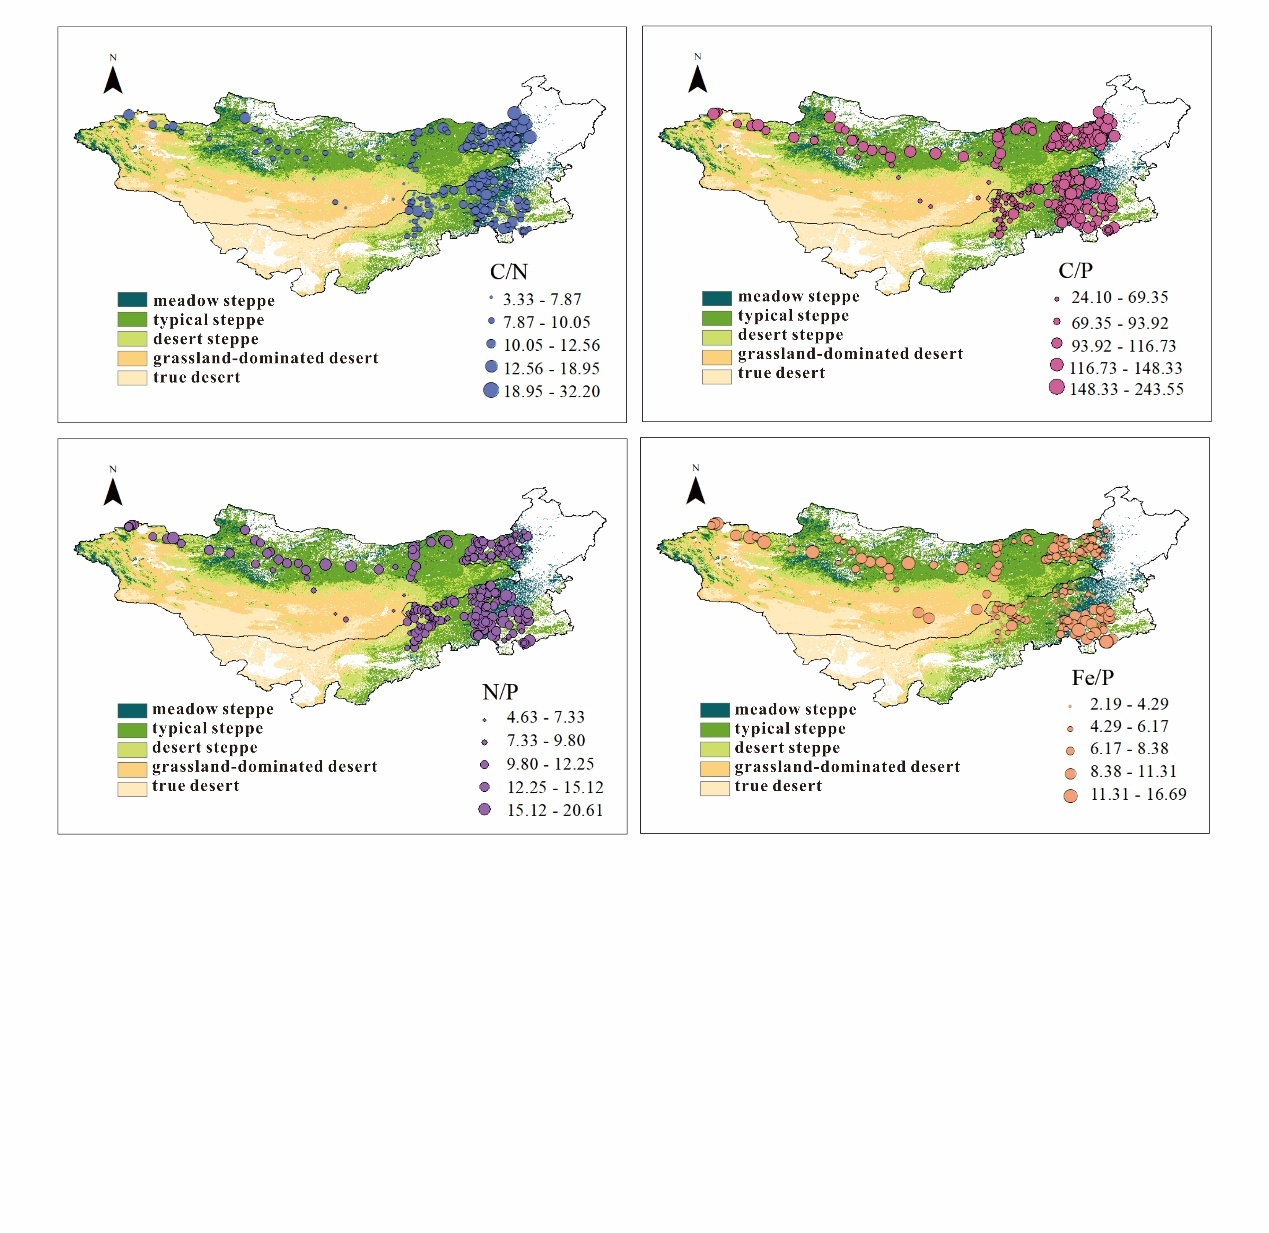


**Fig. 3** The spatial distribution characteristics of soil C/N, C/P, N/P, and Fe/P

**Table S1** The soil cation exchange capacity of different grassland types

|  | CEC (cmol/kg) |
| --- | --- |
| Meadow steppe | 21.90 ± 1.25 a |
| Typical steppe | 14.43 ± 0.47 b |
| Desert steppe | 14.90 ± 0.54 b |

1. * Corresponding author, Email: [lcw2008@imu.edu.cn](mailto:lcw2008@imu.edu.cn) [↑](#footnote-ref-1)
