# Supplementary material
Source: Research Square preprint supplement (doi:10.21203/rs.3.rs-10146877/v1)

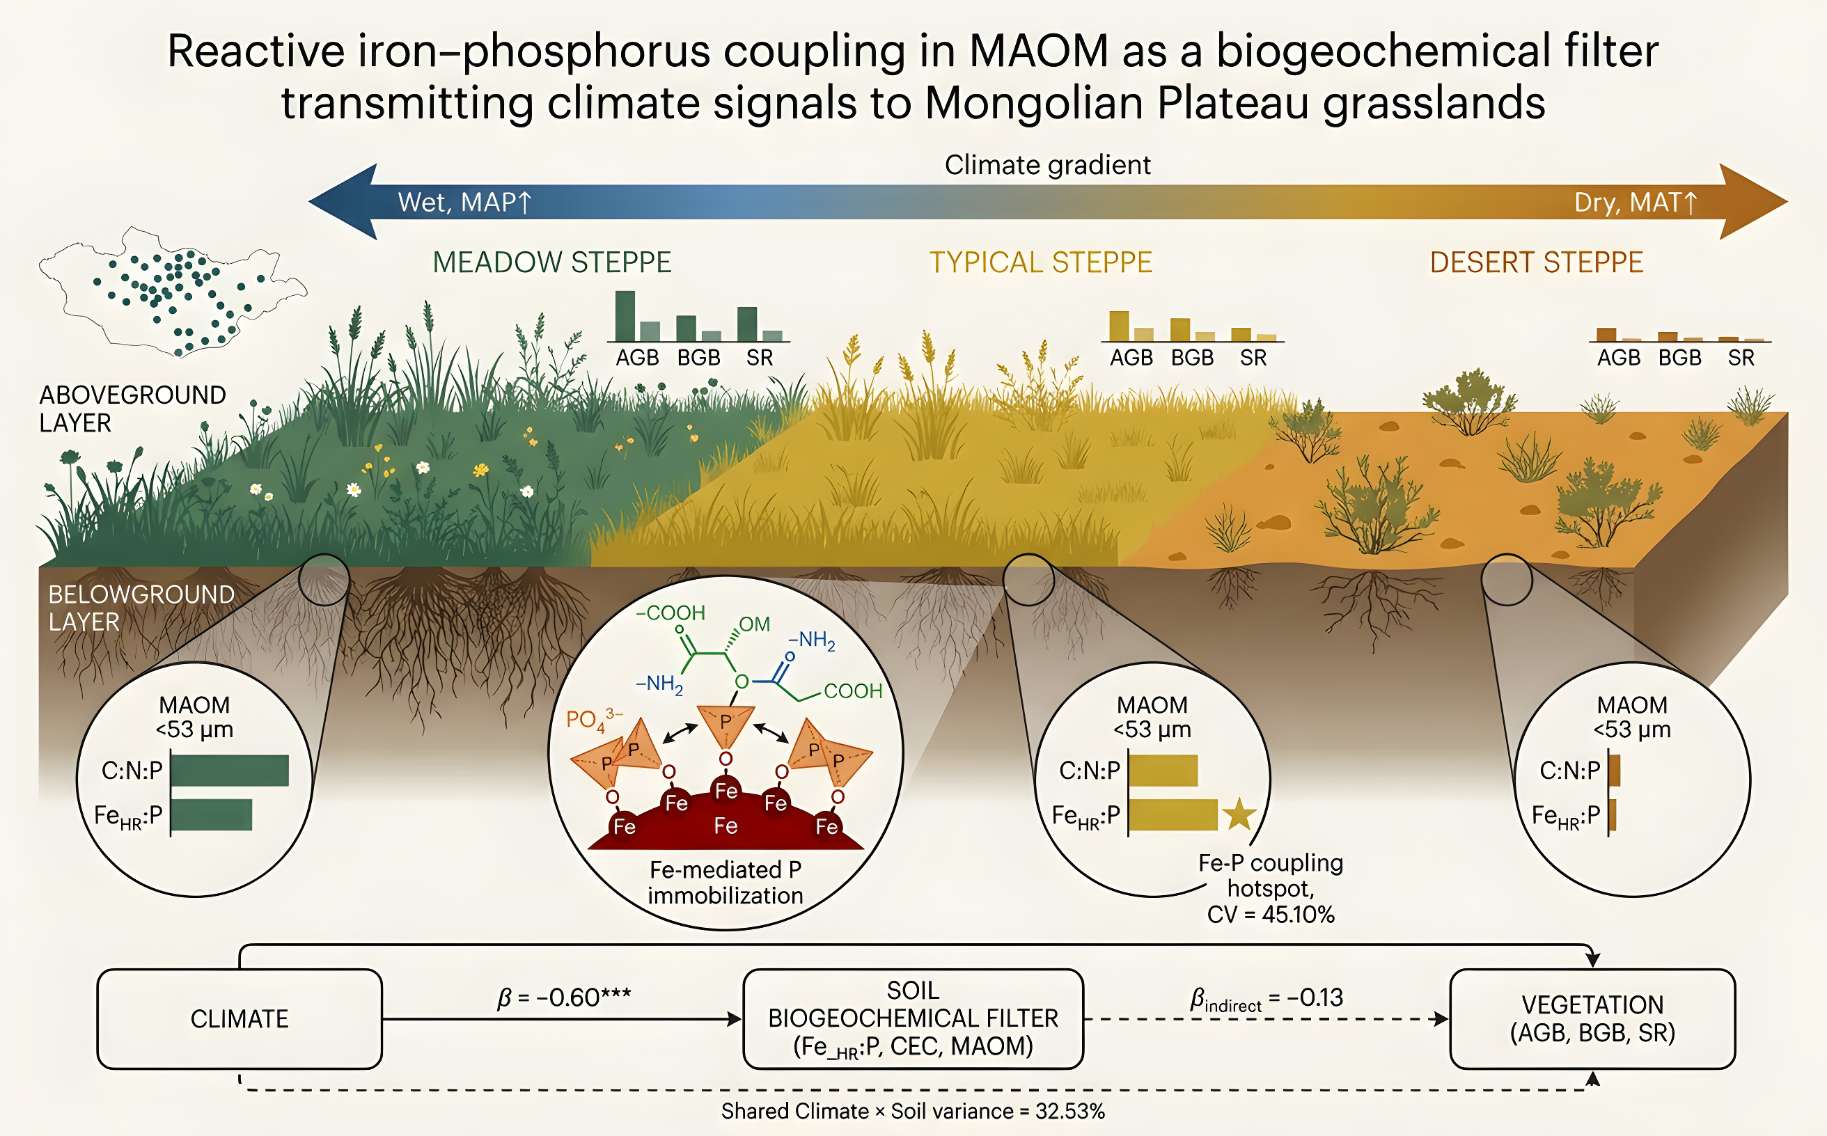


**Graphical Abstract**

Supplement: Supplementary file 2 [file f12d4d0caa6f6473547327bc.docx]
